# Supplementary material
Source: publisher figshare collection journal article supplement (https://gsapubs.figshare.com/ndownloader/files/23300822)
Supplement: Supplementary file 1 [file 23300822]

## Sheet: Sheet1
Sample Type	Highly Bioturbated Silty and Sandy Mudstone																					Unbioturbated and Low BI Mudstone
Sample No.	1	2	3	4	5	6	7	8	9	10	11	12	13	14	15	16	17	18	19	20	21	22	23	24	25	26	27	28	29	30	31	32	33	34	35	36
Formation - Depositional Environment	Viking Fm - Lower Offshore								Viking Fm - Upper Offshore													Westgate Fm				Viking Fm							Joli Fou Fm
Unique Well Identifier (UWI) and sample depth	00/04-11-66-21W5, 1396.0 m	00/04-11-66-21W5, 1392.7 m	00/04-11-66-21W5, 1386.7 m	00/04-11-66-21W5, 1379.0 m	00/10-05-65-20W5, 1463.3 m	00/10-05-65-20W5, 1456.1 m	02/10-05-65-20W5, 1437.7 m	00/12-07-38-24W4, 1431.4 m	00/10-15-62-19W5, 1672.8 m	00/10-15-62-19W5, 1667.1 m	00/10-15-62-19W5, 1663.8 m	00/10-15-62-19W5, 1663.3 m	00/04-11-66-21W5, 1380.8 m	00/02-28-63-20W5, 1563.2 m	00/02-28-63-20W5, 1561.0 m	00/02-28-63-20W5, 1556.8 m	00/02-28-63-20W5, 1559.0 m	02/10-05-65-20W5 1443.8 m	02/10-05-65-20W5, 1431.0 m	00/12-07-38-24W4, 1429.8 m	00/12-07-38-24W4, 1422.8 m	00/10-15-62-19W5, 1656.1 m	00/10-15-62-19W5, 1657.2 m	00/02-28-63-20W5, 1551.8 m	00/12-07-38-24W4, 1415.6 m	00/04-11-66-21W5, 1401.7 m	00/04-11-66-21W5, 1401.2 m	00/04-11-66-21W5, 1396.6 m	00/04-11-66-21W5, 1393.0 m	00/04-11-66-21W5, 1390.3 m	00/04-11-66-21W5, 1389.3 m	00/04-11-66-21W5, 1387.6 m	00/02-28-63-20W5, 1579.4 m	00/02-28-63-20W5, 1571.6 m	00/10-15-62-19W5, 1686.4 m	00/10-15-62-19W5, 1684.8 m
Foraminiferal Taxa [published in MacEachern et al. (1999) and Stelck et al. (2000)]. All taxa are benthic with the exception of calcareous foraminifera.	1 = Present in sample, Blank = Absent
Ammobaculites erectus	1						1		1									1	1		1					1				1	1		1
Ammobaculites fragmentarius				1					1		1	1	1	1		1				1	1			1	1	1		1		1	1		1			1
Ammobaculites humei											1
Ammobaculites jolifouensis								1	1		1			1		1	1				1			1									1	1	1	1
Ammobaculites obliquus s.s.					1																						1
Ammobaculites obliquus var. A		1																								1	1		1
Ammobaculites obscura	1
Ammobaculites pacalis pattersoni				1
Ammobaculites tyrrelli									1	1		1			1	1	1			1	1	1	1	1	1								1			1
Ammobaculites tyrrelli s.s.		1		1		1																						1	1	1		1
Ammobaculites tyrrelli jolifouensis		1				1	1											1											1
Ammobaculites wallalensis	1			1							1	1
Ammobaculites sp. B																											1
Ammobaculites sp. C																																1
Ammobaculoides athabascensis var.																											1
Ammodiscus anthosatus													1		1										1
Ammodiscus cretacea			1				1									1							1					1	1
Ammodiscus kiowensis	1	1																										1	1				1
Ammodiscus rotalarius														1																		1	1	1
Ammomarginulina sp. A																										1	1								1
Ammotium lorangeri																											1
Ammotium sp. A																										1
Bathysiphon brosgei																						1					1
Bathysiphon vitta																											1
Bulbobaculites engleri	1			1									1		1											1			1	1
Bulbobaculites sp. A																						1
Bulbobaculites sp. C & L						1					1	1			1				1	1	1			1	1								1	1
Bulbobaculites sp. E																											1
Bulbobaculites sp. M				1									1														1	1
Gaudryina canadensis								1													1					1	1						1		1	1
Gaudryina hectori	1	1	1																									1	1				1
Glomospira reata																									1								1
Glomospira tortuosa	1										1					1							1												1
Glomospirella elongata					1																												1		1
Gravellina chamneyi				1			1	1	1		1	1			1				1					1						1	1	1
Haplophragmoides collyra																												1
Haplophragmoides gigas phaseolus									1																											1
Haplophragmoides cf. gilberti						1												1
Haplophragmoides globosa			1	1									1																			1
Haplophragmoides hendersonense																														1
Haplophragmoides kirki							1
Haplophragmoides linki								1												1	1				1
Haplophragmoides postis s .l.	1	1	1		1	1	1						1					1	1							1	1	1	1	1	1	1
Haplophragmoides postis s.s.												1
Haplophragmoides postis goodrichi															1			1										1	1	1	1
Haplophragmoides postis ssp. B												1		1	1	1						1		1									1	1		1
Haplophragmoides yukonensis																								1			1
Haplophragmoides ssp. (juvenile)											1						1						1
Hippocrepina barksdalei	1	1								1					1							1		1				1	1
Hippocrepina sp. (large)	1									1												1			1										1	1
Hippocrepina sp. (wide)																						1
Hippocrepina sp. (narrow)
Hyperammina emacerata																				1	1				1
Hyperammina emacerata var A
Hyperammina sp. wide	1																		1					1								1
Hyperammina sp. narrow									1			1			1		1							1
Miliammina awunensis			1					1							1							1		1	1		1			1	1	1
Miliammina inflata																														1	1
Miliammina inflata 3																									1
Miliammina ischnia																		1
Miliammina manitobensis					1													1									1
Miliammina sproulei				1								1		1	1	1	1					1	1	1
Miliammina subelliptica																	1																		1
Psamminopelta bowsheri														1											1					1	1			1
Psamminopelta subcircularis
Psammonyx? sp.	1																								1
Psammosphaera sp. A	1	1	1	1	1	1	1	1	1	1	1		1	1	1	1	1	1			1	1	1	1	1	1	1	1	1	1			1	1	1	1
Psammosphaera sp. B	1			1				1										1							1	1
Pseudobolivina sp. A?	1																								1
Recurvoides sp.																																	1
Reophacella manitobensis																								1
Reophax deckeri s.s.				1													1																1
Reophax deckeri sliteri				1											1																		1
Reophax deckeri ssp B								1
Reophax fuscus		1																			1										1
Reophax incompta															1		1			1	1			1			1
Reophax texanus							1				1							1	1				1
Reophax troyeri	1		1	1				1	1	1	1	1	1		1	1				1	1	1		1	1	1		1
Reophax tundraensis																														1			1
Reophax vasiformis s.s.								1														1			1							1				1
Reophax vasiformis var A			1					1																	1						1	1
Reophax sp. D	1											1												1						1
Reophax sp. F	1	1																				1									1					1
Reophax sp. G							1			1				1				1																1
Reophax sp. GL3												1																					1
Reophax sp. H				1
Reophax? sp. J	1			1															1
Saccammina alexanderi																								1
Sacammina alexanderi s.s.	1							1					1		1	1								1
Sacammina lathrami						1
Sacammina sp. A																											1			1	1
Sacammina D?
Scherochorella minuta	1	1	1	1		1						1	1	1	1		1	1						1			1		1		1	1		1
Scherochorella pepperensis		1	1	1		1	1						1		1	1		1						1					1	1	1	1	1	1
Siphotextularia rayi	1																											1
Textulariopsis minuta	1	1														1								1
Textulariopsis topogorukensis																										1	1	1
Textularia? sp.																																	1
Thuramminoides septagonalis								1													1				1
Thuramminoides sp. B
Trochammina alcanensis																									1
Trochammina apricarius																											1
Trochammina depressa			1					1					1									1				1
Trochammina exigua																				1
Trochammina gatesensis					1							1													1	1	1
Trochammina rutherfordi						1															1
Trochammina umiatensis											1	1				1							1	1	1	1
Verneuilina canadensis		1						1																1	1
Verneuilinoides borealis	1								1		1	1								1	1							1							1	1
Verneuilinoides perplexus						1
Verneuilinoides tailleuri	1	1	1										1																							1
Verneuilinoides sp. A														1	1													1
Verneuilinoides sp. B																														1
calcareous foraminfera																														1	1	1
Number of Taxa in Sample:	25	15	12	18	6	11	10	15	10	6	13	16	13	10	19	13	10	13	7	9	15	14	8	24	23	15	22	16	13	18	15	13	20	9	9	12
